# Supplementary material for: Magnetic covalent organic framework nanocomposites as a new adsorbent for the determination of polycyclic aromatic hydrocarbons in water and food samples
Source: Royal Society of Chemistry journal article supplement (doi:10.1039/d1ay00496d), 2021-01-01
Supplement: d1ay00496d1.pdf [file d1ay00496d1.pdf]

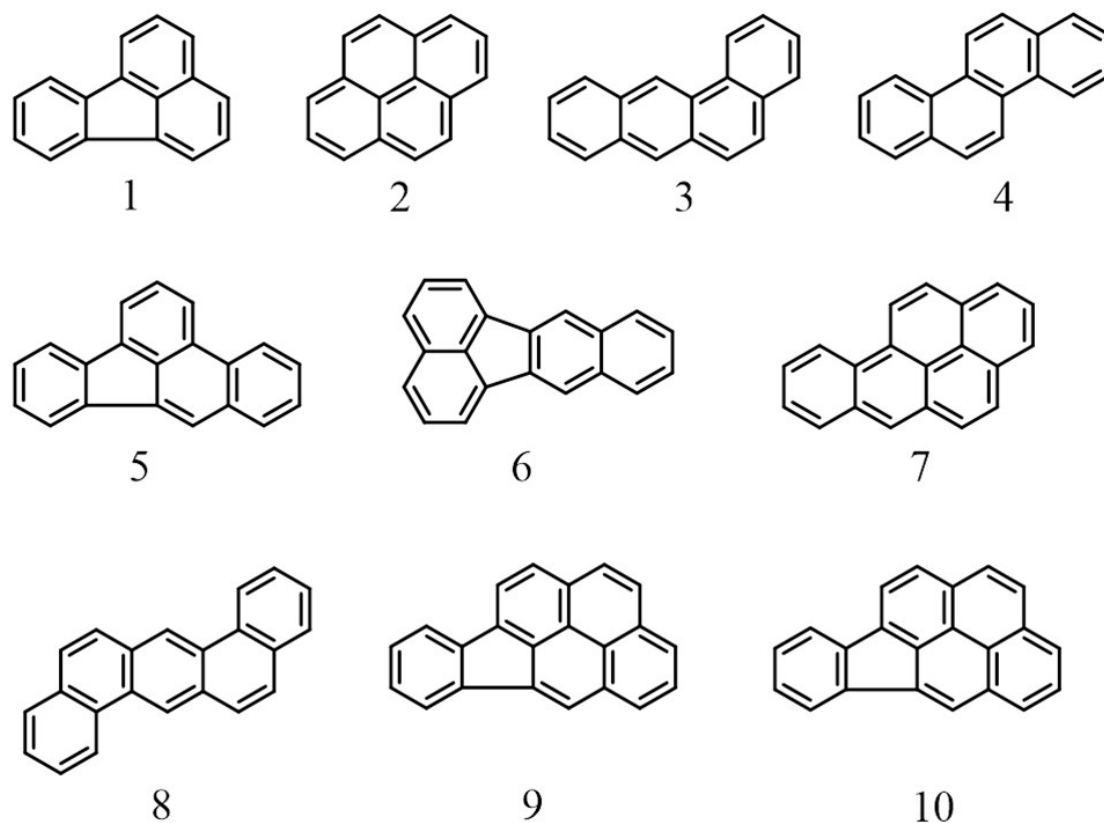

**Fig.S1-Chemical structure of 10 PAHs (1) fluoranthene (Flu), (2) pyrene (Pyr), (3) benzo(a)anthracene (Baa), (4) chrysene (Chr), (5) benzo(b)fluoranthene (Bbf), (6) benzo(k)fluoranthene (Bkf), (7) benzo(a)pyrene (Baf), (8) dibenzo(ah)anthracene (Daa), (9) benzo(ghi)perylene (Bpe), (10) indeno(1,2,3-cd)pyrene (Ipy)**

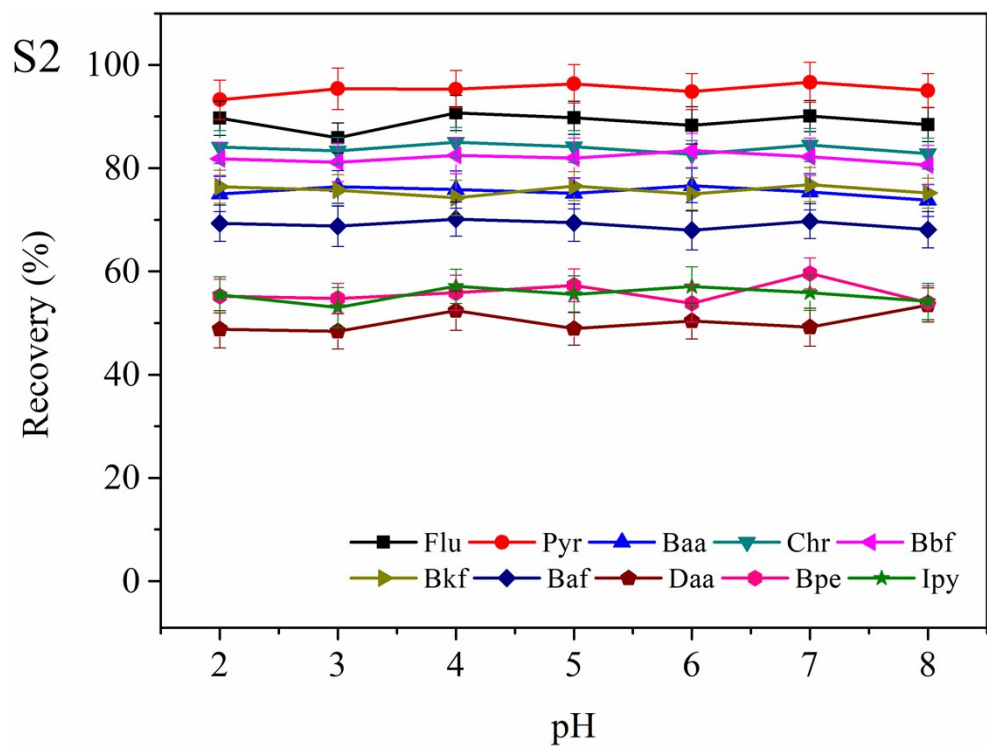

Fig. S2 Effect of sample solution pH

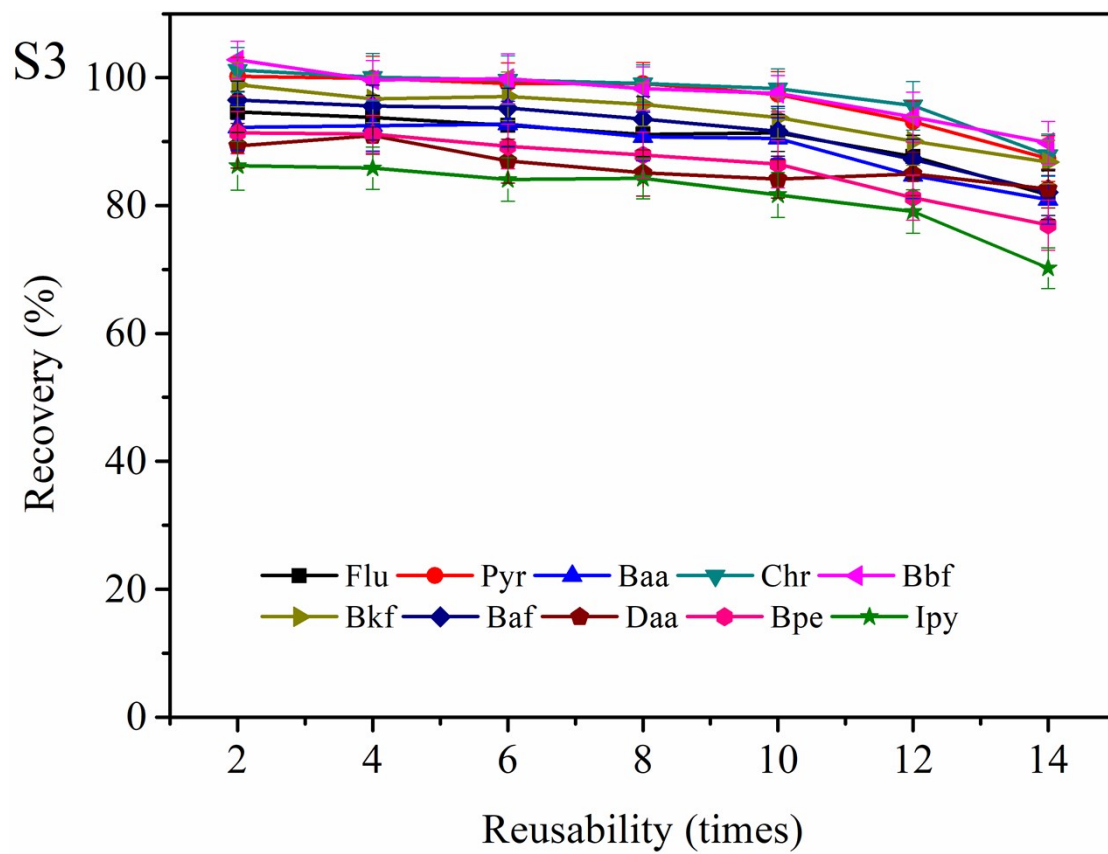

**Fig. S3 Reusability of magnetic adsorbent**
